# Supplementary material for: Modification of In2O3 by electronic promoters to regulate electron transfer behavior of CO2/H2O adsorption and the selectivity of photocatalytic CO2 reduction
Source: Royal Society of Chemistry journal article supplement (doi:10.1039/d2cy02140d), 2023-01-01
Supplement: d2cy02140d1.pdf [file d2cy02140d1.pdf]

## **Supporting information (SI):**

### **Modification of In<sub>2</sub>O<sub>3</sub> by electronic promoters to regulate electron transfer behavior of CO<sub>2</sub>/H<sub>2</sub>O adsorption and the selectivity of photocatalytic CO<sub>2</sub> reduction**

Hong Wang<sup>a,b</sup>, Zhongming Wang<sup>a,b</sup>, Mingquan Xiao<sup>a,b</sup>, Zizhong Zhang<sup>a,b</sup>, Xianzhi Fu<sup>a,b\*</sup>, Wenxin Dai<sup>a,b\*</sup>

<sup>a</sup> Research Institute of Photocatalysis, State Key Laboratory of Photocatalysis on Energy and Environment, Fuzhou University, Fuzhou, 350108, China

<sup>b</sup> Qingyuan Innovation Laboratory, Quanzhou, 362801, China

\*Corresponding author: Wenxin Dai & Xianzhi Fu

Tel & Fax: +86-0591-22865893

E-mail: daiwenxin@fzu.edu.cn & xzfu@fzu.edu.cn

## **Materials and methods:**

### **The sensor sample was synthesised via drop-coating method**

A commercial alumina sheet (1.5 cm × 1 cm) with a comb-like gold electrode on one side surface was used as the substrate for sensors. A 50 µL suspension (30 mg of above In<sub>2</sub>O<sub>3</sub>(B), F-In<sub>2</sub>O<sub>3</sub>(B) and NH<sub>2</sub>-In<sub>2</sub>O<sub>3</sub>(B) samples was dispersed into a 1 mL ethanediol solvent) was dropped onto the surface of the comb-like gold electrode. Then, this substrate coated with samples suspension was dried at 80 °C for 2 h. In<sub>2</sub>O<sub>3</sub>(B), F-In<sub>2</sub>O<sub>3</sub>(B) and NH<sub>2</sub>-In<sub>2</sub>O<sub>3</sub>(B) sensor samples were obtained.

### **Characterization**

The phase and crystal structure of samples were characterized by X-ray diffraction (XRD, D8 Advance, Bruker, Germany) having Cu K $\alpha$  radiation. Powder X-ray diffraction analysis was carried out in the 2 $\theta$  range 20°-60°. The accelerating voltage was 40 kV and the current was 40 mA. Zeta potentials ( $\xi$ ) measurements of the samples were determined by dynamic light scattering analysis (Zeta sizer 3000HSA) at room temperature. Electron paramagnetic resonance (EPR) spectra were recorded on a Bruker A300 spectrometer operating at X-band microwave frequency (9.84 GHz). Transmission electron microscopy (TEM) investigation together with an electron-diffraction image was carried out on a JEOL JEM-2010 EX with field emission gun at 200 kV. The electrochemical analysis was carried out in a conventional three-electrode cell using a Pt plate and an Ag/AgCl electrode as the counter electrode and reference electrode through electrochemical workstation (AUT302N.V, Metrohm, Switzerland). The steady-state photoluminescence (PL) spectroscopy were used to

probe fluorescence intensity of samples with excitation wavelength of 325 nm through Hitachi F-7000 fluorescence spectrometer (Hitachi, Tokyo, Japan). The static water contact angles were measured at 25 °C using the optical contact angle meter system (DSA25, KRUSS, Germany).

The X-ray photoelectron spectroscopy (XPS) and ultraviolet photoelectron spectroscopy (UPS) data of samples were collected using a Thermo Nicolet ESCALAB 250 electron spectrometer. The binding energies were corrected for the charge shift using the C1s peak of graphitic carbon (BE = 284.80 eV) as a calibration.

UPS measurements were carried out using the He I photon line ( $h\nu = 21.2$  eV) of a He discharge lamp from VSW dosed with  $10^{-7}$  mbar of He. The analyzer was the same as for the XPS measurements, but now working with a pass energy of 5 eV. When the spectra were collected, samples were -5 V biased. The work functions ( $\Phi$ ) and Fermi level ( $E_{vm}$ ) are calculated with the equation <sup>1</sup>:

$$\Phi = h\nu - (E_{\text{Cutoff}} - E_{\text{Fermi}}) \quad \text{Equation (S1)}$$

$$\Phi = E_{vm} - E_{fm} \quad \text{Equation (S2)}$$

where  $\Phi$ ,  $E_{fm}$ ,  $E_{vm}$ ,  $h\nu$ ,  $E_{\text{cutoff}}$ , and  $E_{\text{Fermi}}$  are the work functions, Fermi level, vacuum level, the excitation energy (21.22 eV), the cutoff and the Fermi level edge, respectively.

The contact potential difference between the samples and the spectrometer, versus normal hydrogen electrode (NHE) at pH= 7, was estimated using the formula <sup>2,3</sup>:

$$E_{\text{NHE}}/V = \Phi + VB_{\text{max}} - 4.44 \quad \text{Equation (S3)}$$

Where  $E_{\text{NHE}}$ : potential of normal hydrogen electrode,  $\Phi$  of 3.88 eV: the electron

work function of the spectrometer.

UV-vis diffuse reflectance spectra (UV-vis DRS) of samples were recorded with UV-vis spectrophotometer (Cary-5000, Varian, U.S.A), the spectra were recorded between 300 and 800 nm using BaSO<sub>4</sub> as reference. The band gap energy ( $E_g$ ) of samples determination from the Tauc plot by the following equation <sup>4</sup>:

$$(\alpha h\nu)^n = A \cdot (h\nu - E_g) \quad \text{Equation (S4)}$$

where  $h$  is the Planck constant,  $\nu$  is the photon's frequency,  $A$  is a constant, and  $n$  factor depends on the nature of the electron transition and is equal to 1/2 or 2 for the direct and indirect transition band gaps, respectively.

### **Electron transfer behavior of CO<sub>2</sub>/H<sub>2</sub>O adsorption**

The gas sensing properties of In<sub>2</sub>O<sub>3</sub>(B), F-In<sub>2</sub>O<sub>3</sub>(B) and NH<sub>2</sub>-In<sub>2</sub>O<sub>3</sub>(B) sensors were conducted in a 100 mL stainless steel chamber with a quartz window. The response of sample sensors to the gas was described by the variation of its impedance. During the testing process, a high purity N<sub>2</sub> was introduced into the chamber as the background atmosphere, and the 10 % CO<sub>2</sub> balanced with the high purity N<sub>2</sub> and humid N<sub>2</sub> (H<sub>2</sub>O) were acted as the probe gas. Among them, H<sub>2</sub>O was introduced into the chamber using a bubbling system with nitrogen (humid N<sub>2</sub>). The total flow rate was maintained at 250 mL · min<sup>-1</sup>. The resistance of the film sensor was measured via a JF02F gas sensing test system (Kunming GuiYanJinFeng Tech. Corp. Ltd, its main components seen in Fig. S1) and the applied voltage was controlled at 5.0 V. Prior to any measurement, the film sensor sample was maintained at 100 °C for one hour in a high purity N<sub>2</sub> to remove the physical adsorption of H<sub>2</sub>O and gas

adsorbates.

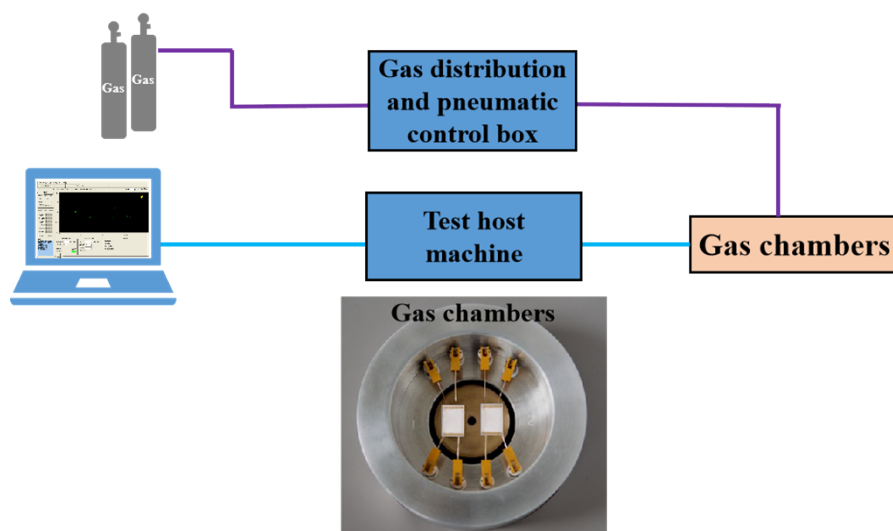

**Fig. S1** Schematic diagram of gas sensing test system.

### **In situ DRIFTS testing**

The in-situ diffuse reflectance infrared Fourier transform spectroscopy (in-situ DRIFTS) measurements were conducted using the specially designed in-situ DRIFTS reactor cell tube (its main structure seen in Fig. S2) and smart collector accessory on a Bruker vextor 80v FT-IR Spectrometer with MCT detector. Four UV lamps with a wavelength centered at 365 nm (4 W, Philips TL/05) were used as the radiation source (also as the light source in other experiments in this work, its spectrogram seen in Fig. S4). First, the sample was loaded in an in-situ DRIFTS reactor cell and subjected to evacuation at 100 °C for 1 h in N<sub>2</sub> atmosphere (the total flow rate was maintained at 60 mL·min<sup>-1</sup>) to remove the physisorbed water/moisture. During this process of the in-situ DRIFTS experiment, the recorded data was within the 4000-1100 cm<sup>-1</sup> spectral range with a resolution of 8 cm<sup>-1</sup>. Each spectrum was obtained by averaging 64 scans in order to reduce the signal-to-noise ratios.

After cooled down to room temperature, firstly, UV light was introduced and the sample was collected the spectrum as a collection background under UV radiation for 20 min. Then, the 10% CO<sub>2</sub> (N<sub>2</sub>) and humid N<sub>2</sub> (H<sub>2</sub>O), as the probe gas was introduced into the system with the total flow rate at 60 mL·min<sup>-1</sup> for 10min. Cutting down both the inlet and outlet of probe gas, and the datum was collected after 1h dark adsorption and 1h light illumination in N<sub>2</sub> atmosphere to obtain the spectrum of sample.

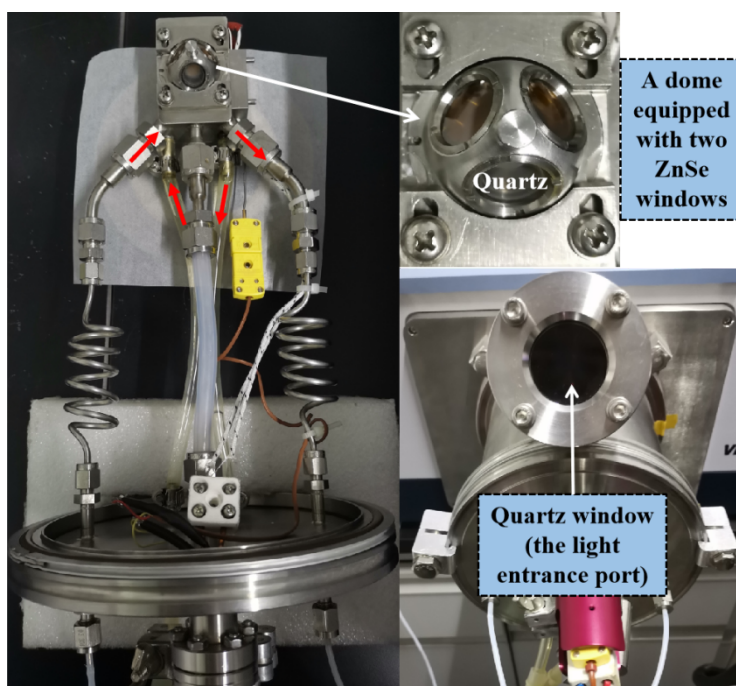

**Fig. S2** Main structure of in-situ DRIFTS reactor cell.

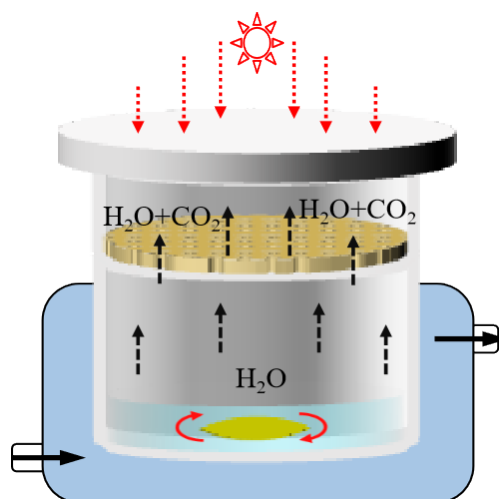

**Fig. S3** Schematic diagram of reactor structure.

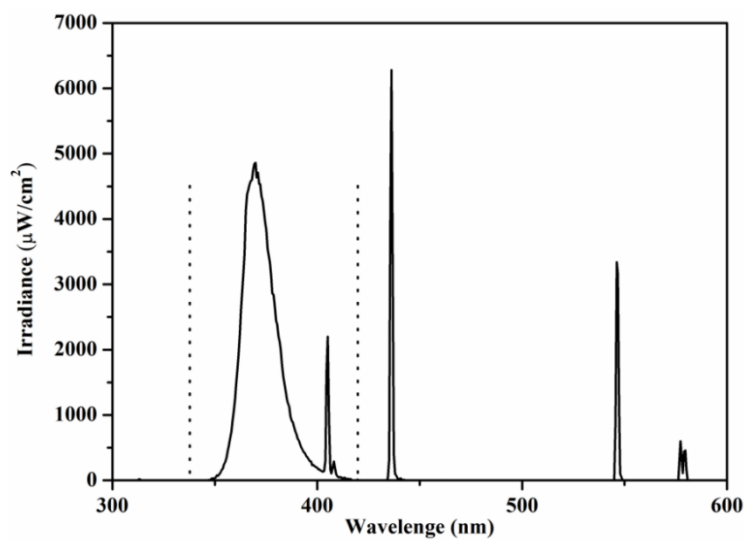

**Fig. S4** Spectrogram of the light source used in the experiment.

## Results and discussion:

### Material characterization

Fig. S5 shows the FTIR spectra of  $\text{In}_2\text{O}_3(\text{B})$  and  $\text{NH}_2\text{-In}_2\text{O}_3(\text{B})$  samples. The spectrum of  $\text{NH}_2\text{-In}_2\text{O}_3(\text{B})$  exhibits the following bands: The stretching characteristic bands of Si-OH and Si-O in 3425 and 874  $\text{cm}^{-1}$  respectively, the asymmetrical and symmetrical stretching -NH in 3265, 3100 and 1631  $\text{cm}^{-1}$ , and the bands 798  $\text{cm}^{-1}$  can be attributed to regions of angular deformation outside the plane of  $\text{-NH}_2$  groups, all of the above infrared peaks were generated from APTES<sup>5</sup>, indicating that the surface of  $\text{In}_2\text{O}_3(\text{B})$  was successfully modified with the electronic promoters  $\text{NH}_2^+$ . In addition, the  $\text{CH}_x$  ( $\nu_{\text{as}} \text{CH}_2$  and  $\nu_{\text{as}} \text{CH}_3$ ) (the bands in the range of 2932-2853  $\text{cm}^{-1}$ ) and C-C (1442  $\text{cm}^{-1}$ ) species<sup>5,6</sup> may arise from the isopropyl alcohol.

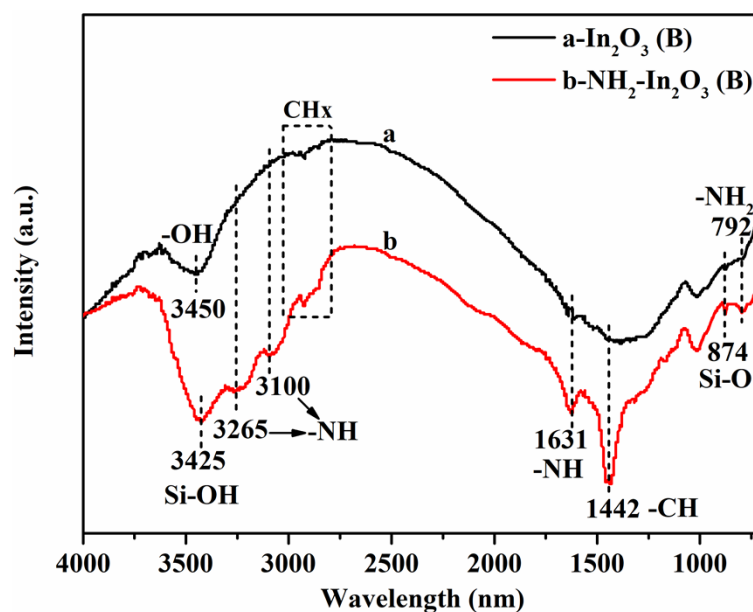

**Fig. S5** FTIR spectra of (a)  $\text{In}_2\text{O}_3(\text{B})$  and (b)  $\text{NH}_2\text{-In}_2\text{O}_3(\text{B})$  samples.



## Photocatalytic performance of CO<sub>2</sub> reduction with H<sub>2</sub>O

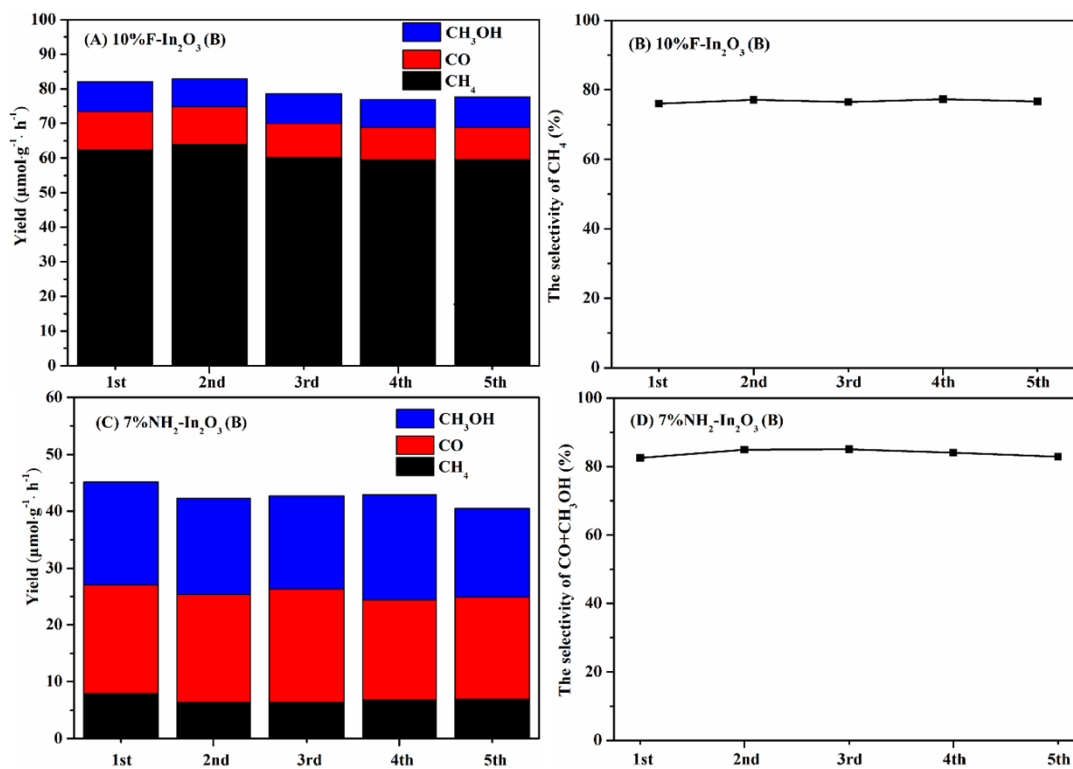

**Fig. S6** Stability test of (A, B) 10%F-In<sub>2</sub>O<sub>3</sub>(B) and (C, D) 7%NH<sub>2</sub>-In<sub>2</sub>O<sub>3</sub>(B) samples.

## Results of $^{13}\text{CO}_2+\text{D}_2\text{O}$ isotope experiments

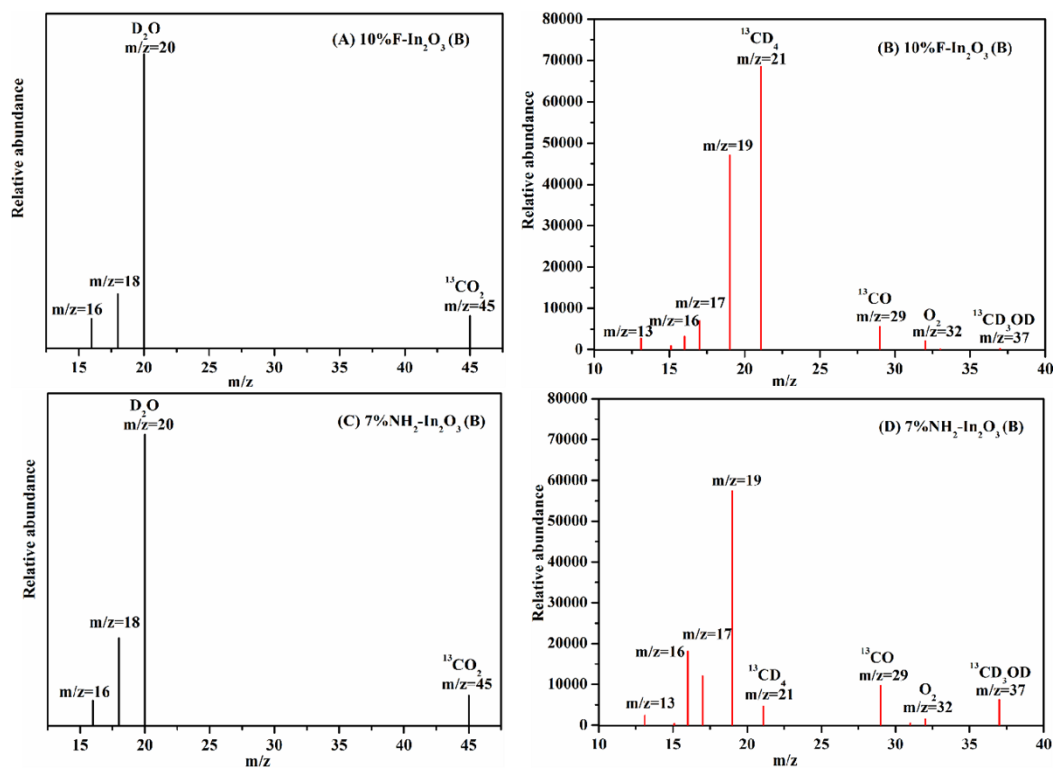

**Fig. S7** Mass spectra of  $^{13}\text{CO}_2+\text{D}_2\text{O}$  isotope experiments over over (A, B) F- $\text{In}_2\text{O}_3$  (B) and (C, D)  $\text{NH}_2$ - $\text{In}_2\text{O}_3$  (B) samples.

## Photocatalytic CO<sub>2</sub>+H<sub>2</sub> reaction performances over different samples

Photocatalytic reduction of CO<sub>2</sub> with H<sub>2</sub> over the material samples were carried out under identical conditions. The reacted gases with high-purity CO<sub>2</sub> (10 mL) and H<sub>2</sub> (30 mL) (CO<sub>2</sub> + H<sub>2</sub> system) were added into the reactor. Subsequently, the reactor was heated to 80 °C via a constant-temperature H<sub>2</sub>O bath, and the reaction products were detected after UV radiation for 1 h by an gas chromatograph. The activity results under UV radiation were shown in Fig. S8, the overall activity of photocatalytic CO<sub>2</sub> reduction with H<sub>2</sub> over three samples was significantly improved as compared to CO<sub>2</sub>+H<sub>2</sub>O systems, H<sub>2</sub> can deeply hydrogenate CO<sub>2</sub> to CH<sub>4</sub> due to its strong reducing ability, only a small amount of CO was generated. In CO<sub>2</sub>+H<sub>2</sub> system, the effect of electronic promoters on the reduction degree of the CO<sub>2</sub> reaction was not obvious, but the trend was the same. It also confirmed that modification of In<sub>2</sub>O<sub>3</sub> with F<sup>-</sup> (electron donors) and NH<sub>2</sub><sup>+</sup> ions (electron acceptors) effectively regulated product selectivity, where the reduction degree of the CO<sub>2</sub> reaction increased and decreased, respectively.

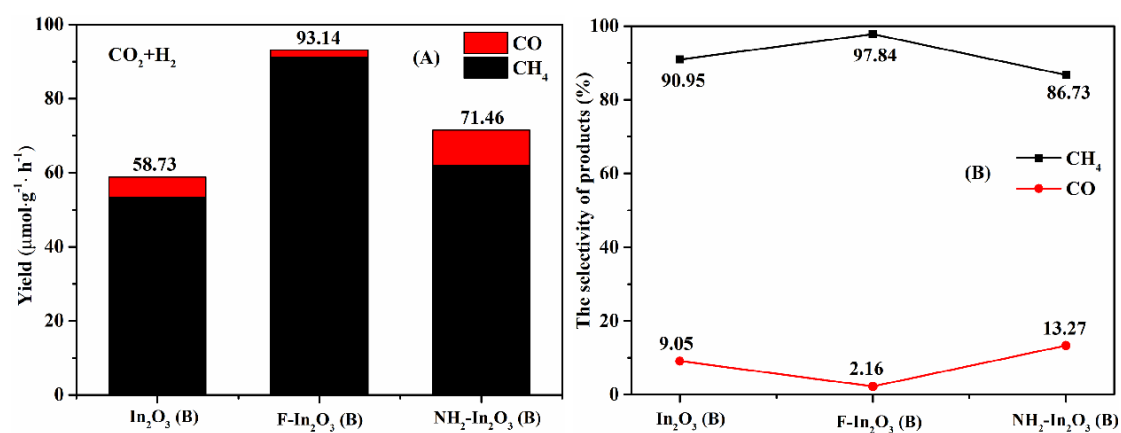

**Fig. S8** Yields of photocatalytic CO<sub>2</sub>+H<sub>2</sub> reaction (A) and product selectivity (B) over In<sub>2</sub>O<sub>3</sub>(B), F-In<sub>2</sub>O<sub>3</sub>(B) and NH<sub>2</sub>-In<sub>2</sub>O<sub>3</sub>(B) samples under UV radiation after 1 h.

## XPS Analysis

XPS survey spectra of the three samples in Fig. S9 and Table S3, the  $\text{In}_2\text{O}_3(\text{B})$  (Fig. S9-a) reveals that the surface of the sample was composed of the elements of indium and oxygen, the C1s peak located at the binding energy of 284.8 eV was generated from the correction for specimen charging by referencing C<sup>7</sup>. The F- $\text{In}_2\text{O}_3(\text{B})$  (Fig. S9-b) and  $\text{NH}_2\text{-In}_2\text{O}_3(\text{B})$  (Fig. S9-c) indicates the similar elements to the pure  $\text{In}_2\text{O}_3$ , but some peaks were assigned to F1s and N1s, respectively. The atomic ratio of O:In in samples have been also calculated from the XPS survey spectra to be about 1.77, 1.82 and 2.28 for  $\text{In}_2\text{O}_3(\text{B})$ , F- $\text{In}_2\text{O}_3(\text{B})$  and  $\text{NH}_2\text{-In}_2\text{O}_3(\text{B})$  samples, respectively. These values are very close to results of EDS elemental mapping (Fig. 8). Notably, the three samples contain such high level oxygen elemental, it is possible that all samples were rich in surfaces oxygen vacancy defects, resulting in more the  $\text{O}_v$  and adsorbed oxygen species on the surface. At this time, the oxygen elemental detected by XPS and EDS spectrum contains a variety of oxygen species ( $\text{O}_{\text{lat}}$ ,  $\text{O}_v$  and adsorbed oxygen species). Through comparative analysis, it can be found that the larger the surface oxygen vacancy concentration (Fig. 3), the higher ratio of oxygen elemental (Fig. 8 and Table S3), which was also consistent with the results of XPS-O1s spectrum. Moreover, there are scanning depth and width differences on two instruments, resulting in different results of the content of F and N elements in the two test methods (EDS and XPS spectrum).

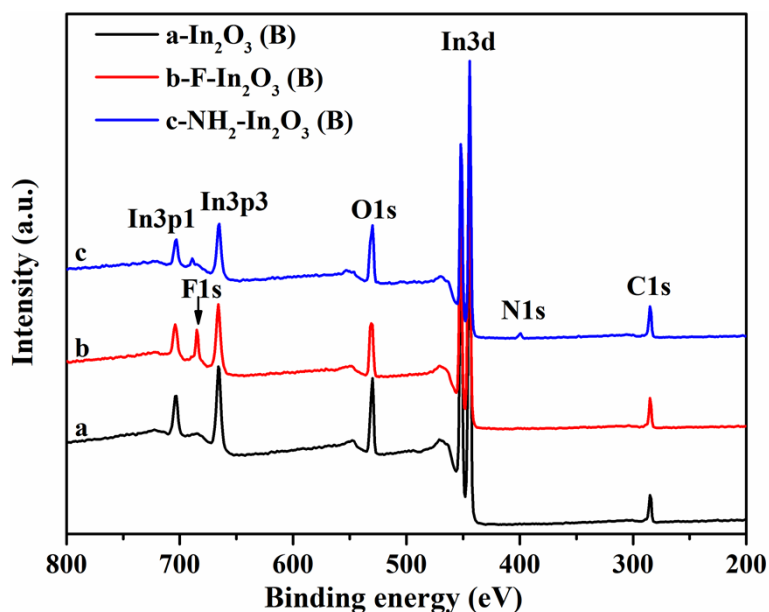

**Fig. S9** XPS survey spectra of the (a)  $\text{In}_2\text{O}_3(\text{B})$ , (b)  $\text{F-In}_2\text{O}_3(\text{B})$  and (c)  $\text{NH}_2\text{-In}_2\text{O}_3(\text{B})$  samples.

**Table S1** The calculated atomic content from the XPS survey spectra of samples.

| Sample                                        | Name | Peak BE | Area (P) CPS.eV | Area (N) TPP-2M | Atomic (%) | Atomic ratios of O/In |
|-----------------------------------------------|------|---------|-----------------|-----------------|------------|-----------------------|
| $\text{In}_2\text{O}_3(\text{B})$             | C1s  | 284.80  | 85985.71        | 1205.73         | 31.38      | 1.77                  |
|                                               | In3d | 444.18  | 1963610.08      | 952.39          | 24.79      |                       |
|                                               | O1s  | 529.73  | 290728.49       | 1683.69         | 43.83      |                       |
| $\text{F-In}_2\text{O}_3(\text{B})$           | C1s  | 284.80  | 83267.81        | 1167.61         | 30.19      | 1.82                  |
|                                               | F1s  | 684.72  | 122538.37       | 566.70          | 14.65      |                       |
|                                               | In3d | 444.54  | 1557622.58      | 755.67          | 19.54      |                       |
| $\text{NH}_2\text{-In}_2\text{O}_3(\text{B})$ | O1s  | 530.65  | 237630.21       | 1377.18         | 35.61      | 2.28                  |
|                                               | C1s  | 284.80  | 97000.38        | 1360.18         | 38.61      |                       |
|                                               | N1s  | 399.37  | 16748.52        | 151.30          | 4.29       |                       |
|                                               | In3d | 444.03  | 1264510.11      | 613.24          | 17.41      |                       |
|                                               | O1s  | 529.65  | 241414.28       | 1398.01         | 39.69      |                       |

**Table S2** Variation of various characteristic peaks from the O1s XPS of In<sub>2</sub>O<sub>3</sub>(B), F-In<sub>2</sub>O<sub>3</sub>(B) and NH<sub>2</sub>-2In<sub>2</sub>O<sub>3</sub>(B) samples before and after adsorption.

| Sample                                                     | Name             | Peak BE | Area (eV) | Atomic (%) |
|------------------------------------------------------------|------------------|---------|-----------|------------|
| In <sub>2</sub> O <sub>3</sub> (B)-Before                  | O <sub>lat</sub> | 529.71  | 181377.28 | 60.95      |
|                                                            | O <sub>v</sub>   | 531.43  | 116073.57 | 39.05      |
| In <sub>2</sub> O <sub>3</sub> (B)-After                   | O <sub>lat</sub> | 529.76  | 175285.45 | 58.79      |
|                                                            | O <sub>v</sub>   | 531.36  | 122752.56 | 41.21      |
| F-In <sub>2</sub> O <sub>3</sub> (B)-Before                | O <sub>lat</sub> | 529.81  | 98350.75  | 40.64      |
|                                                            | O <sub>v</sub>   | 531.66  | 143488.65 | 59.36      |
| F-In <sub>2</sub> O <sub>3</sub> (B)-After                 | O <sub>lat</sub> | 529.71  | 125027.44 | 40.50      |
|                                                            | O <sub>v</sub>   | 531.72  | 183455.50 | 59.50      |
| NH <sub>2</sub> -In <sub>2</sub> O <sub>3</sub> (B)-Before | O <sub>lat</sub> | 529.53  | 108185.34 | 43.90      |
|                                                            | In-O-N           | 530.57  | 48596.34  | 19.73      |
|                                                            | O <sub>v</sub>   | 532.00  | 89496.33  | 36.37      |
| NH <sub>2</sub> -In <sub>2</sub> O <sub>3</sub> (B)-After  | O <sub>lat</sub> | 529.66  | 104343.23 | 37.88      |
|                                                            | In-O-N           | 530.43  | 61905.14  | 22.48      |
|                                                            | O <sub>v</sub>   | 531.97  | 109033.24 | 39.64      |

**Table S3** Variation of various characteristic peaks from the F1s and N1s XPS of F-In<sub>2</sub>O<sub>3</sub>(B) and NH<sub>2</sub>-In<sub>2</sub>O<sub>3</sub>(B) samples before and after adsorption.

| Sample                                                     | Name                          | Peak BE | Area (eV) | Atomic (%) |
|------------------------------------------------------------|-------------------------------|---------|-----------|------------|
| F-In <sub>2</sub> O <sub>3</sub> (B)-Before                | InF <sub>3</sub>              | 684.69  | 110392.32 | 95.30      |
|                                                            | O-In-F <sub>lat</sub>         | 688.67  | 5426.49   | 4.70       |
| F-In <sub>2</sub> O <sub>3</sub> (B)-After                 | InF <sub>3</sub>              | 684.88  | 58065.32  | 85.11      |
|                                                            | O-In-F <sub>lat</sub>         | 688.61  | 10131.60  | 14.89      |
| NH <sub>2</sub> -In <sub>2</sub> O <sub>3</sub> (B)-Before | -NH <sub>2</sub>              | 399.32  | 13164.10  | 81.10      |
|                                                            | -NH <sub>3</sub> <sup>+</sup> | 401.04  | 3064.80   | 18.90      |
| NH <sub>2</sub> -In <sub>2</sub> O <sub>3</sub> (B)-After  | -NH <sub>2</sub>              | 399.46  | 3741.89   | 50.43      |
|                                                            | -NH <sub>3</sub> <sup>+</sup> | 400.29  | 3677.03   | 49.57      |

### References:

1. Z.M. Wang, H. Wang, X.X. Wang, X. Chen, Y. Yu, W.X. Dai and X.Z. Fu, *Chinese J. Catal*, 2021, **42**, 1538-1552.
2. D.M. Zhao, C.L. Dong, B. Wang, C. Chen, Y.C. Huang, Z.D. Diao, S.Z. Li, L.J. Guo and S.H. Shen, *Adv. Mater.*, 2019, **31**, 1903545.
3. H.J. Yu, R. Shi, Y.X. Zhao, T. Bian, Y.F. Zhao, C. Zhou, G.I.N. Waterhouse, L.Z. Wu, C.H. Tung and T.R. Zhang, *Adv. Mater.*, 2017, **29**, 1605148.
4. P. Makuła, M. Pacia and W. Macyk, *J. Phys. Chem. Lett.*, 2018, **9**, 6814-6817.
5. V.V.C. Lima, F.B.D. Nora, E.C. Peres, G.S. Reis, É.C. Lima, M.L.S. Oliveira and

- G.L. Dotto, *J Environ Eng*, 2019, **7**, 103410.
6. W.W. Wang, W.Z. Yu, P.P. Du, H. Xu, Z. Jin, R. Si, C. Ma, S. Shi, C.J. Jia and C.H. Yan, *ACS Catal.*, 2017, **7**, 1313-1329.
7. X.H. Yang, H.T. Fu, Y. Tian, Q. Xie, S.X. Xiong, D.Z. Han, H. Zhang, X.Z. An, *Sens. Actuators B Chem.*, 2019, **296**, 126696.
